# Supplementary material for: Novel anti-CD3 chimeric antigen receptor targeting of aggressive T cell malignancies
Source: PubMed Central journal article supplement (PMC5302909; doi:10.18632/oncotarget.11019), 2016-08-02
Supplement: oncotarget-07-56219-s001.pdf [file oncotarget-07-56219-s001.pdf]

# Novel anti-CD3 chimeric antigen receptor targeting of aggressive T cell malignancies

## Supplementary Material

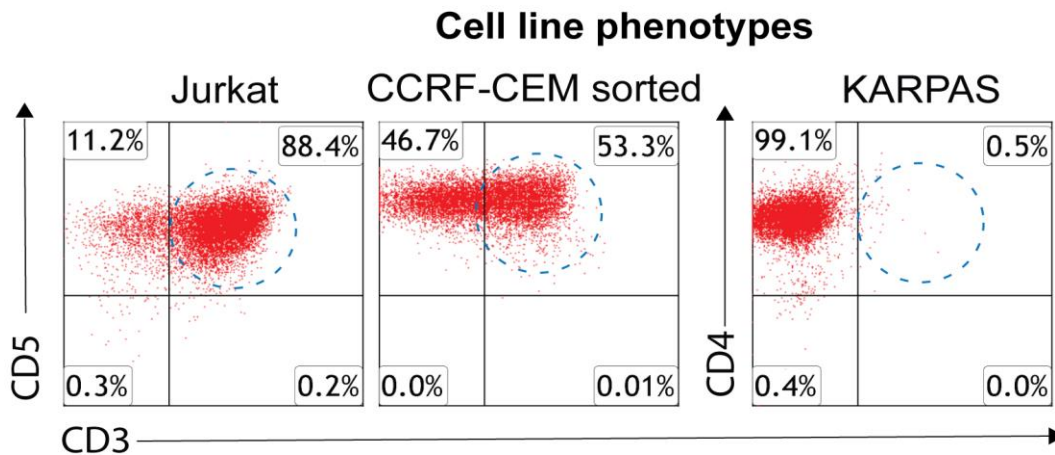

**Figure S1: Cell line phenotypes**

Flow cytometry analysis of T-cell leukemia cell lines Jurkat, sorted CCRF-CEM<sup>CD3<sup>+</sup></sup>, and KARPAS. Target cell Jurkat is a CD3<sup>+</sup>CD5<sup>+</sup> cell line while CCRF-CEM<sup>CD3<sup>+</sup></sup> was sorted for CD3<sup>high</sup> cells leading a smeared phenotype of gradient CD3 expression when compared to wild-type CCRF-CEM cells. KARPAS is a CD3<sup>-</sup> negative control cell line that expresses CD4.

## Sorted vs. wild-type CCRF-CEM

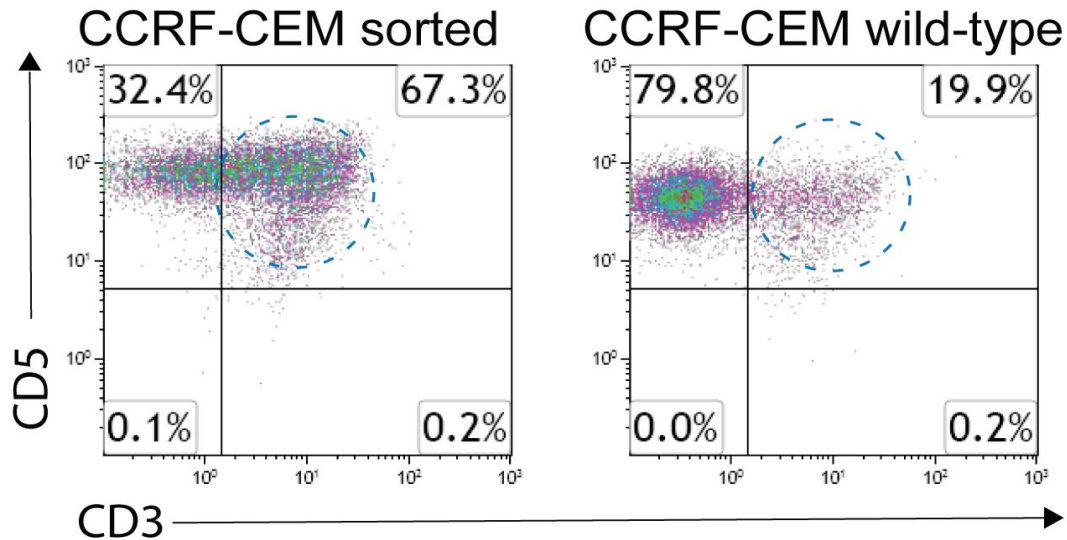

**Figure S2: Comparison of wild-type CCRF-CEM with sorted CCRF-CEM<sup>CD3+</sup>**

Flow cytometry density plots comparing wild-type CCRF-CEM cells with sorted CCRF-CEM<sup>CD3+</sup> cells. The population distribution shows that in wild-type CCRF-CEM populations, the majority of the cells are CD3<sup>-</sup> and exists as a solid population. The CD3<sup>+</sup> residuals of wild-type CCRF-CEM exists as a minority population of around 20%. After FACS sorting of this minor population, the resultant CCRF-CEM<sup>CD3+</sup> population exhibits as a consistent distributed smear likely signifying an overall CD3<sup>+</sup> population with gradient expression. CCRF-CEM cells are also CD5<sup>+</sup>.

### Specific cytotoxicity assays

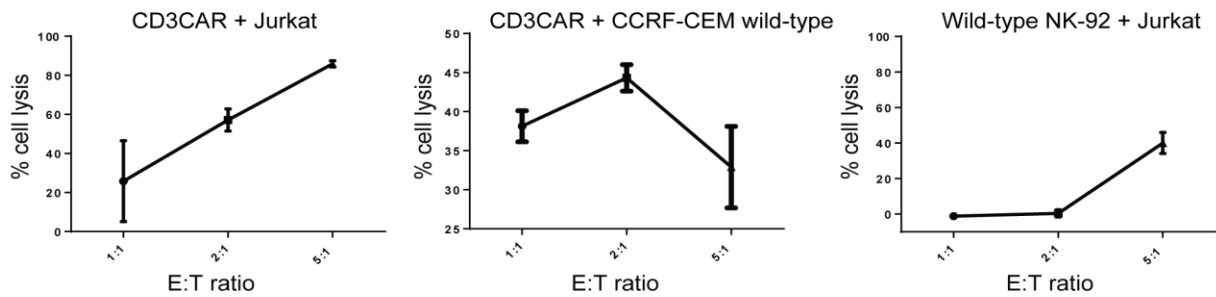

**Figure S3: Specific cytotoxicity assays**

Specific assays were conducted as described in Materials and Methods and were used as a corollary to support the co-culture assays done in Figures 2 and 3. Briefly, target Jurkat and wild-type CCRF-CEM cells were labeled with CFSE dye and non-target negative control KARPAS were labeled with CMTMR dye. Target and non-target cells were incubated together at 1:1 ratios with varying amounts of CD3CAR or wild-type NK-92 cells to specific E:T ratios. Cytotoxicity was measured by normalizing the relative survival of the target cells against non-target cells by a control sample with no effector cells added. The Jurkat cytotoxicity assay results in % cell lysis numbers comparable with co-culture assays done in Figure 2. Against minority CD3<sup>+</sup> wild-type CCRF-CEM, % lysis is correspondingly lower, with saturation reached at around 35% lysis (as predicted by wild-type CCRF-CEM phenotype). The cytotoxicity assays also reveal baseline wild-type NK-92 cell lytic ability against the Jurkat cell line, with negligible non-specific lysis at E:T ratios of 1:1 and 2:1. Upon increasing the E:T ratio to 5:1, this non-specific intrinsic NK-mediated cell killing rose to 35-40%.

| NAME                                         | VENDOR            | HOST SPECIES | CATALOG #    | CLONE #    | DILUTION | USE                                                        |
|----------------------------------------------|-------------------|--------------|--------------|------------|----------|------------------------------------------------------------|
| CD3zeta-CD247                                | Thermo Fisher     | Mouse        | MA5-15608    | 4B10       | 1:500    | Western Blot                                               |
| Goat anti-mouse HRP                          | Abnova            | Goat         | PAB10746     | n/a        | 1:2000   | Western Blot                                               |
| Goat anti-mouse F(Ab') <sup>2</sup> , biotin | Jackson           | Goat         | 115-066-072  | n/a        | 1:250    | F(Ab') <sup>2</sup> detection/Flow cytometry               |
| R-Phycoerythrin Streptavidin                 | Jackson           | n/a          | 016-110-084  | n/a        | 1:250    | Secondary for F(Ab') <sup>2</sup> detection/Flow cytometry |
| Anti-human CD3-PerCP                         | Tonbo Biosciences | Mouse        | 65-0037-T025 | OKT3       | 1:50     | Flow cytometry                                             |
| Anti-human CD56-PE                           | Tonbo Biosciences | Mouse        | 50-0564-T100 | NCAM, MY31 | 1:50     | Flow cytometry                                             |
| Anti-human CD7-APC                           | Tonbo Biosciences | Mouse        | 561604       | M-T701     | 1:50     | Flow cytometry                                             |
| Anti-human CD34-PE.cy7                       | Tonbo Biosciences | Mouse        | 560710       | 581        | 1:50     | Flow cytometry                                             |
| Anti-human CD5-APC                           | Tonbo Biosciences | Mouse        | 20-0059-T100 | UCHT2      | 1:50     | Flow cytometry                                             |
| CMTMR                                        | Life Technologies | n/a          | C2927        | n/a        | 5 µM     | Flow cytometry                                             |

**Supplementary Table 1: Flow cytometry, Western Blot reagents**
